# Supplementary material for: UV crosslinkable emulsions with silver nanoparticles for inkjet printing of conductive 3D structures
Source: Royal Society of Chemistry journal article supplement (doi:10.1039/c3tc30253a), 2013-01-01
Supplement: c3tc30253a.pdf [file c3tc30253a.pdf]

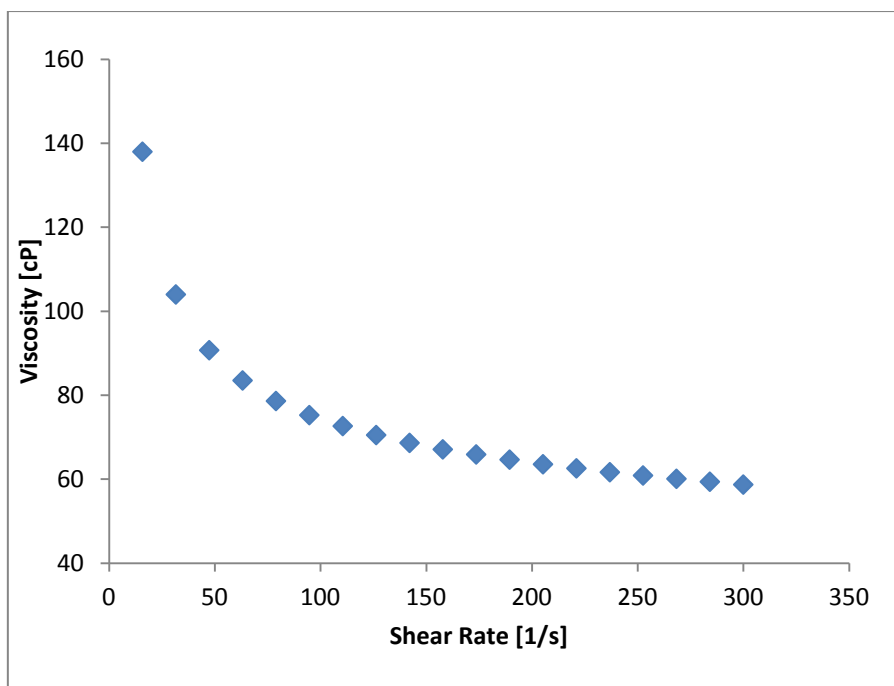

Viscosity vs. shear rate dependence for an ink containing 20% Ag nanoparticles

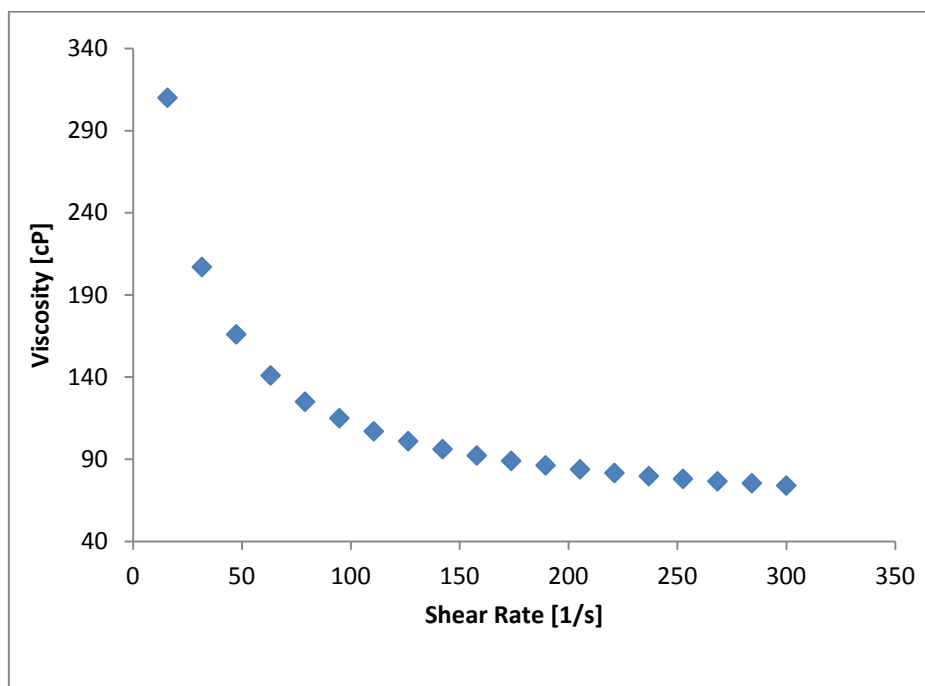

Viscosity vs. shear rate dependence for an ink containing 30% Ag nanoparticles
